# Supplementary material
Source: PubMed Central journal article supplement (PMC3543008)
Supplement: supp_M112.377564_jbc.M112.377564-1.pdf [file supp_M112.377564_jbc.M112.377564-1.pdf]

Table S1. *S. cerevisiae* strains used in this study

| Strain                       | Genotype                                                                                           | Source     |
|------------------------------|----------------------------------------------------------------------------------------------------|------------|
| $[pin^-]$ (74-D694)          | <i>MATa, ade1-14UGA, ura3-52, leu2-3,112, trp1-289, his3-200, [psi^-][pin^-]</i>                   | (1)        |
| $[pin^-]$ alpha              | <i>MAT<math>\alpha</math>, ade1-14UGA, ura3-52, leu2-3,112, trp1-289, his3-200, [psi^-][pin^-]</i> | This study |
| $[PIN^+]^{low}$ (L1943)      | <i>MATa, ade1-14UGA, ura3-52, leu2-3,112, trp1-289, his3-200, [psi^-][PIN^+]^{low}</i>             | (2)        |
| $[PIN^+]^{low}$ deletions    | <i>MATa, ade1-14UGA, ura3-52, leu2-3,112, trp1-289, his3-200 [psi^-]<br/>deleted gene::HIS3</i>    | This study |
| $[PIN^+]^{medium}$ (L1945)   | <i>MATa, ade1-14UGA, ura3-52 leu2-3,112, trp1-289, his3-200 [psi^-][PIN^+]^{medium}</i>            | (2)        |
| $[PIN^+]^{medium}$ deletions | <i>MATa, ade1-14UGA, ura3-52, leu2-3,112, trp1-289, his3-200 [psi^-]<br/>deleted gene::HIS3</i>    | This study |
| $[PIN^+]^{high}$ (L1749)     | <i>MATa, ade1-14UGA, ura3-52 leu2-3,112, trp1-289, his3-200 [psi^-][PIN^+]^{high}</i>              | (2)        |
| $[PIN^+]^{high}$ deletions   | <i>MATa, ade1-14UGA, ura3-52, leu2-3,112, trp1-289, his3-200 [psi^-]<br/>deleted gene::HIS3</i>    | This study |
| HF7c                         | <i>MATa his3-200 leu2-3 trp1-901 ura3-52 LYS::GALIUAS-GALITATA-HIS3</i>                            | Clontech   |

## SUPPLEMENTAL REFERENCES

1. Derkatch, I. L., Chernoff, Y. O., Kushnirov, V. V., Inge-Vechtomov, S. G., and Liebman, S. W. (1996) Genesis and variability of  $[PSI]$  prion factors in *Saccharomyces cerevisiae*. *Genetics* **144**, 1375–1386
2. Bradley, M. E., Edskes, H. K., Hong, J. Y., Wickner, R. B., and Liebman, S. W. (2002) Interactions among prions and prion “strains” in yeast. *Proc. Natl. Acad. Sci. U.S.A.* **99**, 16392–16399

## SUPPLEMENTAL FIGURE LEGENDS

**Figure S1.** Confirmation of  $[PSI^+]$  induction in haploid deletion strains. Putative  $[PSI^+]$  colonies (Figure 1) were streaked onto YEPD medium containing 3 mM Guanidine HCl and then restreaked onto CSM and CSM-ADE media to confirm effective prion curing. The presence of red pigment on CSM medium and the lack of growth on CSM-ADE medium suggest that  $[PSI^+]$  was effectively cured, thereby signifying that the growth of induced colonies on CSM-ADE medium observed in Figure 1 was prion-related and suggesting that they were  $[PSI^+]$ .

**Figure S2.** Maintenance of chaperone gene deletion-induced changes in  $[PIN^+]$  variant-dependent phenotypes. Chaperone deletion strains were mated with a wild-type  $[psi^-][pin^-]$  strain, and the resulting diploids were analyzed for  $[PSI^+]$  induction efficiency (A) and frequency of multiple Rnq1-GFP foci in foci-containing cells (B). Error bars represent SEMs. Student's *t*-tests were done to compare quantification in deletion strains versus their parental wild-type strain. \* $P < 0.05$ , \*\* $P < 0.01$ , \*\*\* $P < 0.001$ .

**Figure S3.** Confirmation of  $[PSI^+]$  induction in haploid progeny. Putative  $[PSI^+]$  colonies from wild-type (+) and mutant (-) haploid progeny (Figure 4) were streaked onto YEPD medium containing 3 mM Guanidine HCl and then restreaked onto CSM and CSM-ADE media to confirm effective prion curing. The presence of red pigment on CSM medium and the lack of growth on CSM-ADE medium suggest that  $[PSI^+]$  was effectively cured, thereby signifying that the growth of induced colonies on CSM-ADE medium observed in Figure 3 was prion-related and suggesting that they were  $[PSI^+]$ .

**Figure S4.** Dominance of chaperone gene deletion-induced variants. Diploids were generated by mating chaperone deletion stains with a wild-type  $[psi^-]$  strains carrying the  $[PIN^+]^{low}$  or  $[PIN^+]^{medium}$  or  $[PIN^+]^{high}$  variant. These diploids were analyzed for  $[PSI^+]$  induction efficiency (A) and frequency of multiple Rnq1-GFP foci in foci-containing cells (B). Error bars represent SEMs. Student's *t*-tests were done to compare quantification in deletion strains versus their parental wild-type strain. \* $P < 0.05$ , \*\* $P < 0.01$ , \*\*\* $P < 0.001$ .

**Figure S5.** Characterization of the  $[PIN^+]$  state of the yeast two-hybrid strain, HF7c. A, Rnq1-GFP localizes in a diffuse manner without visible puncta in the HF7c strain. B, SDD-AGE of HA-Rnq1p purified from  $[pin^-]$ ,  $[PIN^+]^{low}$ ,  $[PIN^+]^{medium}$ ,  $[PIN^+]^{high}$  and HF7c strains. HA-Rnq1p isolated from the HF7c strain migrates similarly to HA-Rnq1p isolated from the  $[pin^-]$  strain.
