# Supplementary material
Source: PubMed Central journal article supplement (PMC3543008)

Figure S1

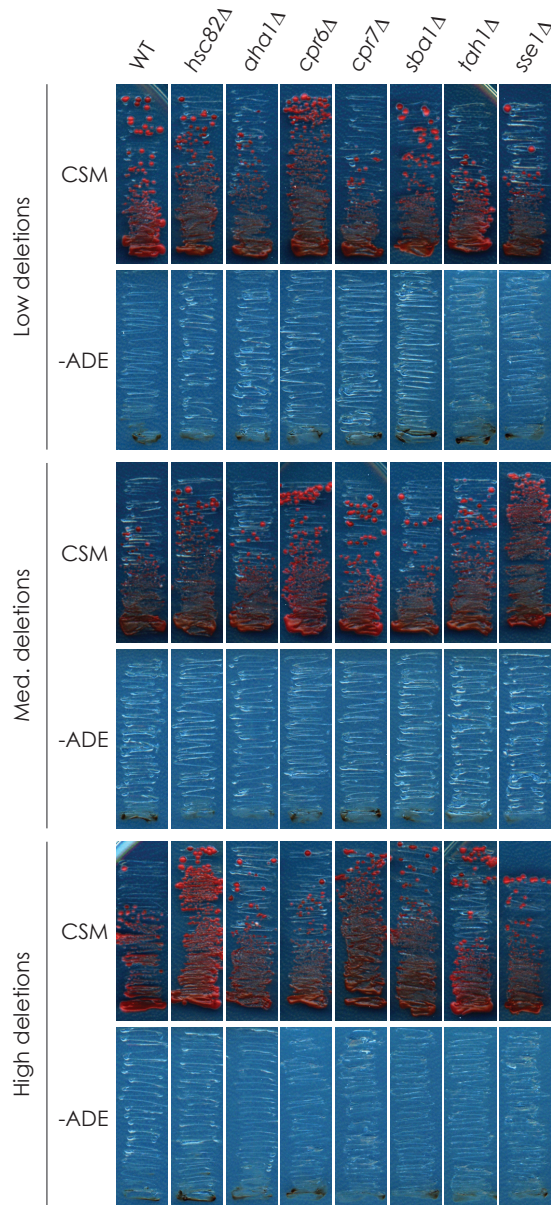

Supplement: supp_M112.377564_jbc.M112.377564-2.pdf [file supp_M112.377564_jbc.M112.377564-2.pdf]

Figure S2

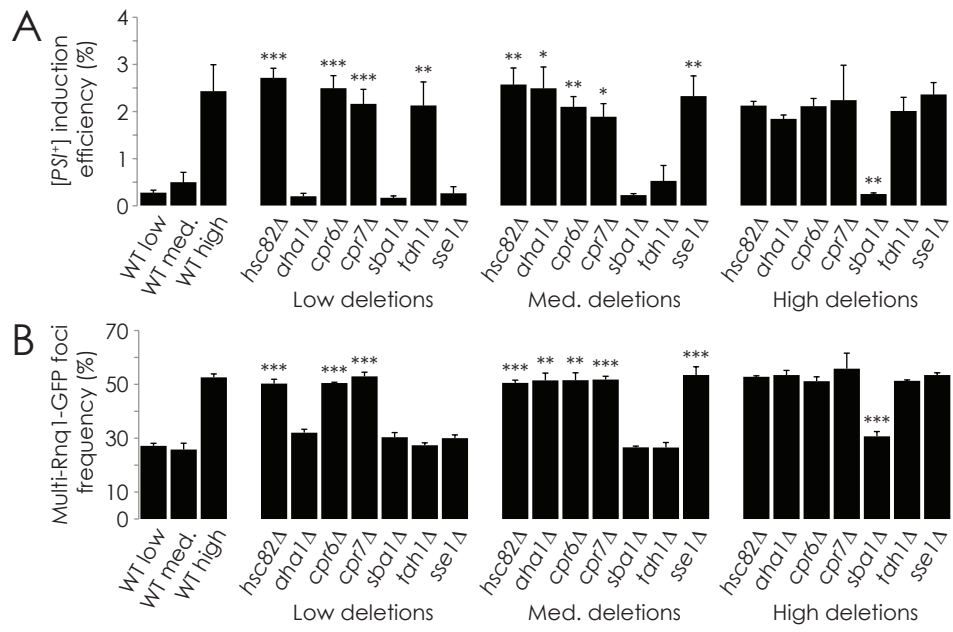

Supplement: supp_M112.377564_jbc.M112.377564-3.pdf [file supp_M112.377564_jbc.M112.377564-3.pdf]

Figure S3

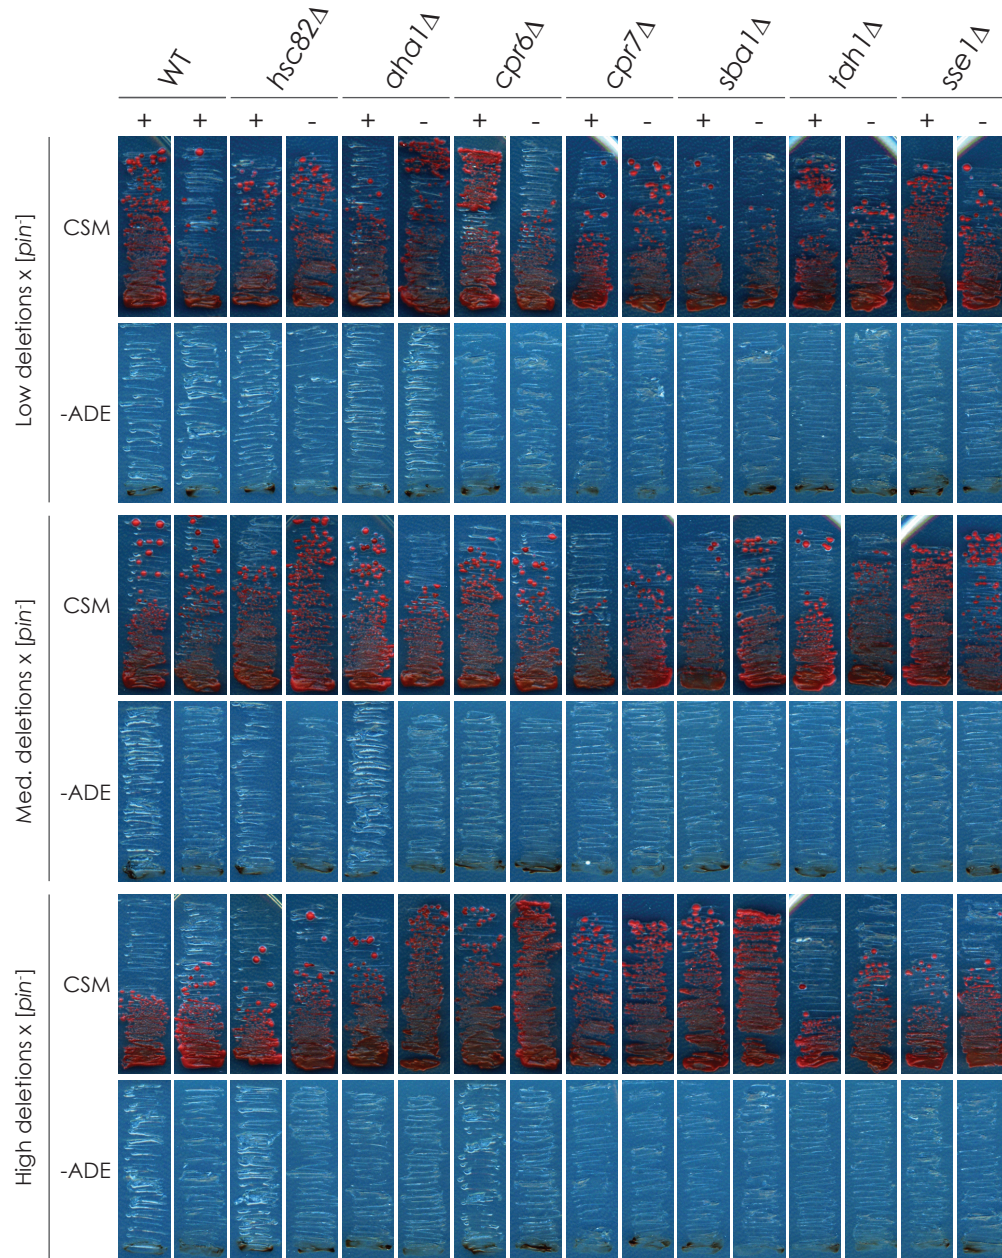

Supplement: supp_M112.377564_jbc.M112.377564-4.pdf [file supp_M112.377564_jbc.M112.377564-4.pdf]

Figure S4

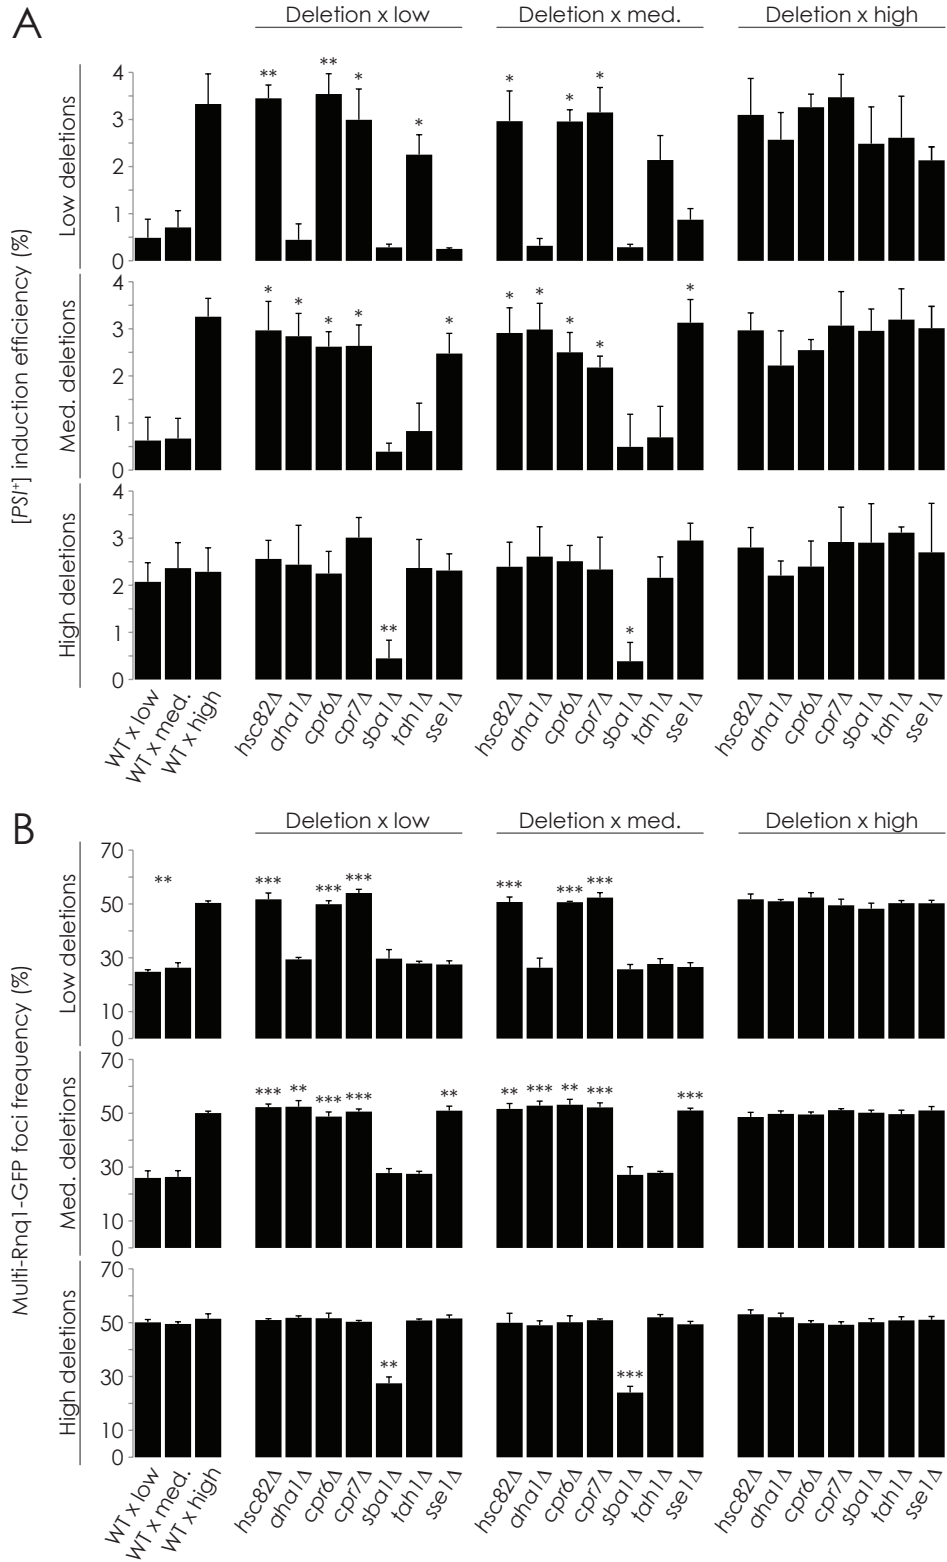

Supplement: supp_M112.377564_jbc.M112.377564-5.pdf [file supp_M112.377564_jbc.M112.377564-5.pdf]

Figure S5

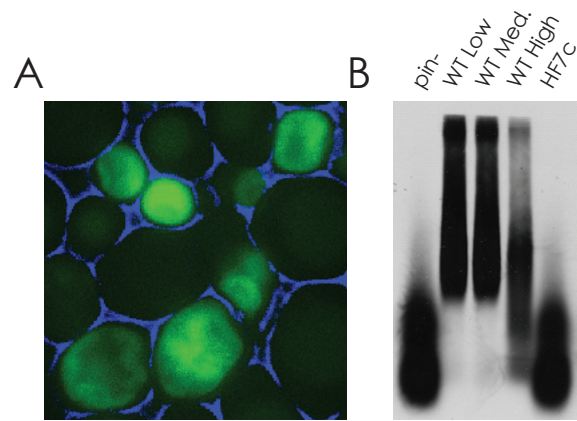

Supplement: supp_M112.377564_jbc.M112.377564-6.pdf [file supp_M112.377564_jbc.M112.377564-6.pdf]
